# Supplementary material for: Comparative assessment of subretinal hyper-reflective material in patients treated with brolucizumab versus aflibercept in HAWK and HARRIER
Source: PubMed Central journal article supplement — Br J Ophthalmol. 2023 Sep 5;108(6):852–8. doi: 10.1136/bjo-2023-323577 (PMC11137441; doi:10.1136/bjo-2023-323577), 2023-09-05

## SHRM in HAWK and HARRIER

**Supplementary Figure S1.** Maximum SHRM thickness across the macula to Week 96 in the brolucizumab and aflibercept arms of (A) pooled HAWK & HARRIER studies, (B) HAWK, and (C) HARRIER study. SE, standard error; SHRM, subretinal hyperreflective material.

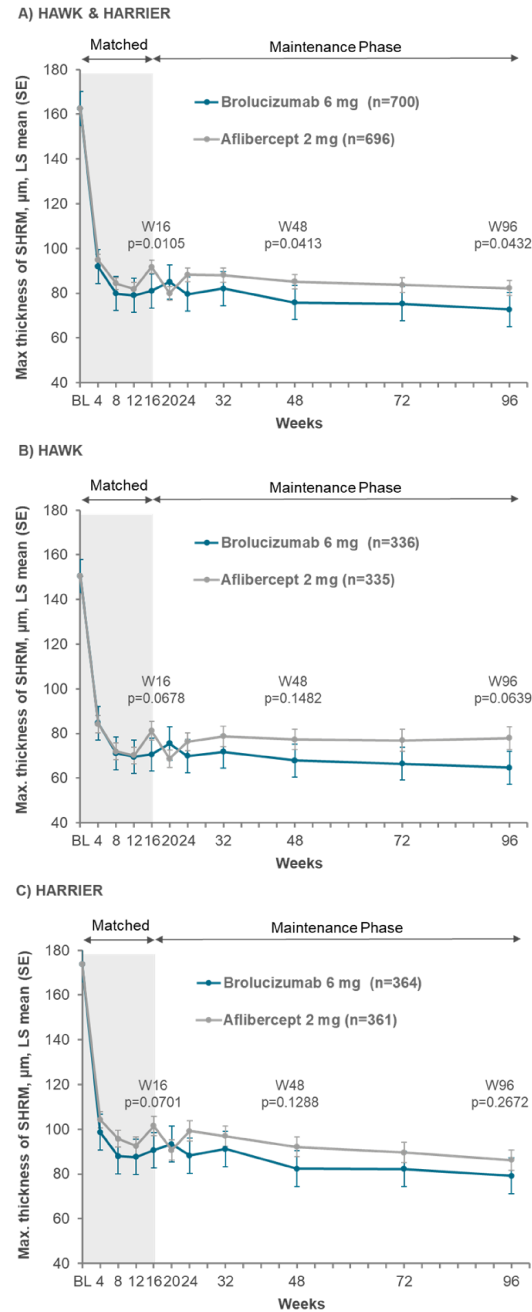

Supplement: bjo-2023-323577supp001.pdf [file bjo-2023-323577supp001.pdf]
