# Supplementary material for: Comparative assessment of subretinal hyper-reflective material in patients treated with brolucizumab versus aflibercept in HAWK and HARRIER
Source: PubMed Central journal article supplement — Br J Ophthalmol. 2023 Sep 5;108(6):852–8. doi: 10.1136/bjo-2023-323577 (PMC11137441; doi:10.1136/bjo-2023-323577), 2023-09-05

## SHRM in HAWK and HARRIER

**Supplementary Figure S2.** Percent reduction in maximum SHRM thickness in the macula to Week 96 in the brolicizumab and aflibercept arms in (A) pooled HAWK & HARRIER studies, (B) HAWK and (C) HARRIER studies, respectively. SHRM, subretinal hyperreflective material.

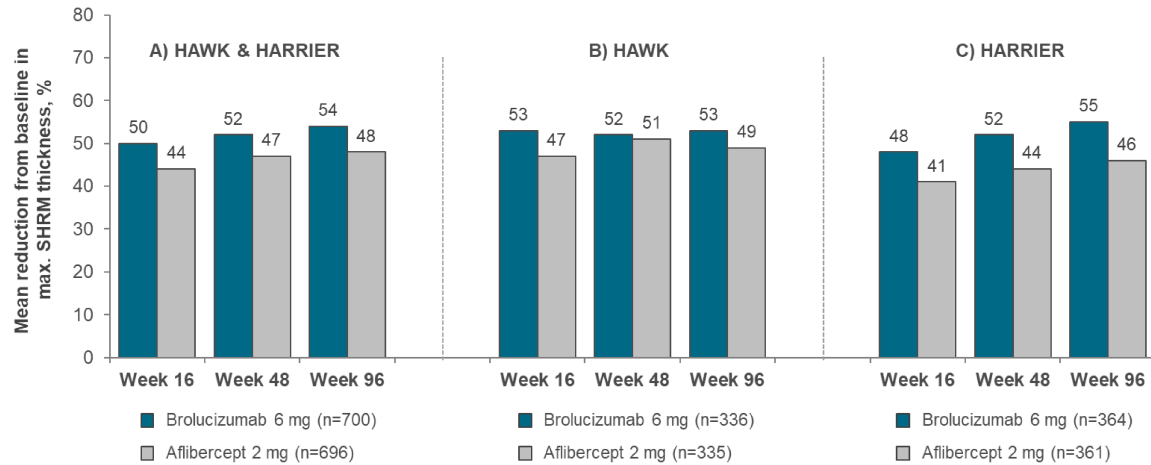

Supplement: bjo-2023-323577supp002.pdf [file bjo-2023-323577supp002.pdf]
