# Supplementary material for: Comparative assessment of subretinal hyper-reflective material in patients treated with brolucizumab versus aflibercept in HAWK and HARRIER
Source: PubMed Central journal article supplement — Br J Ophthalmol. 2023 Sep 5;108(6):852–8. doi: 10.1136/bjo-2023-323577 (PMC11137441; doi:10.1136/bjo-2023-323577), 2023-09-05

## SHRM in HAWK and HARRIER

**Supplementary Figure S3.** A representative case showing relatively large fluctuations in SHRM during anti-VEGF treatment. OCT images from (A) baseline, (B) Week 12, (C) Week 32, and (D) Week 44. OCT, optical coherence tomography; VEGF, vascular endothelial growth factor.

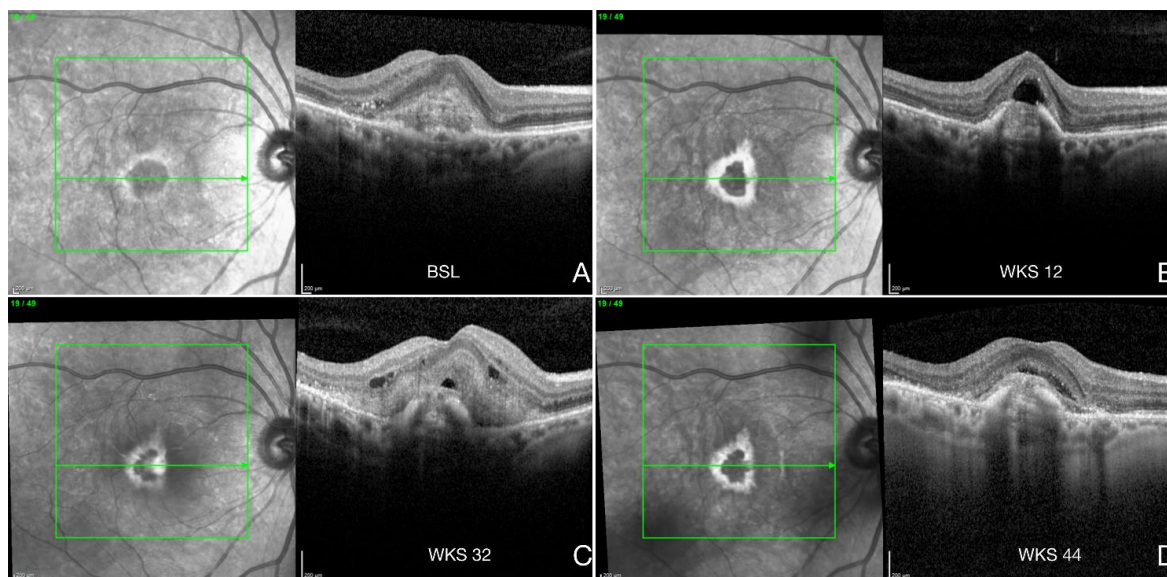

Supplement: bjo-2023-323577supp003.pdf [file bjo-2023-323577supp003.pdf]
